# Supplementary material
Source: ML conference proceedings conference paper supplement (https://proceedings.neurips.cc/paper_files/paper/2020/hash/5a29503a4909fcade36b1823e7cebcf5-Abstract.html)
Supplement: Supplementary file [file 5a29503a4909fcade36b1823e7cebcf5-Supplemental.zip]

---

# Appendix

## Distributionally Robust Parametric Maximum Likelihood Estimation

---

**Viet Anh Nguyen**      **Xuhui Zhang**      **José Blanchet**  
 Stanford University, United States  
 {viet-anh.nguyen, xuhui.zhang, jose.blanchet}@stanford.edu

**Angelos Georgioui**  
 University of Cyprus, Cyprus  
 georgioui.angelos@ucy.ac.cy

This appendix is organized as follows. Section **A-C** provide the detailed proofs for all the technical results in the main paper. Section **D** provides further discussion on the variance regularization surrogate result in Proposition 4.2.

### A Proofs of Section 2

*Proof of Example 2.2.* We note that

$$\begin{aligned}
 \min_{w \in \mathcal{W}} \mathbb{E}_{\hat{\mathbb{P}}}[\ell_\lambda(X, Y, w)] &= \min_{w \in \mathcal{W}} \sum_{c=1}^C \hat{p}_c \left( \Psi(\lambda(w, \hat{x}_c)) - \langle \mathbb{E}_{\hat{\mathbb{P}}_{Y|\hat{x}_c}}[T(Y)], \lambda(w, \hat{x}_c) \rangle \right) \\
 &= \min_{w \in \mathcal{W}} \sum_{c=1}^C \hat{p}_c \left( \Psi(\lambda(w, \hat{x}_c)) - \langle \nabla \Psi(\hat{\theta}_c), \lambda(w, \hat{x}_c) \rangle \right).
 \end{aligned}$$

If  $\hat{\theta}_c = (\nabla \Psi)^{-1}((N_c)^{-1} \sum_{\hat{x}_i = \hat{x}_c} T(\hat{y}_i))$ , then we have

$$\begin{aligned}
 \min_{w \in \mathcal{W}} \mathbb{E}_{\hat{\mathbb{P}}}[\ell_\lambda(X, Y, w)] &= \min_{w \in \mathcal{W}} \sum_{c=1}^C \hat{p}_c \left( \Psi(\lambda(w, \hat{x}_c)) - \left\langle \frac{\sum_{\hat{x}_i = \hat{x}_c} T(\hat{y}_i)}{N_c}, \lambda(w, \hat{x}_c) \right\rangle \right) \\
 &= \min_{w \in \mathcal{W}} \frac{1}{N} \sum_{i=1}^N \left( \Psi(\lambda(w, \hat{x}_i)) - \langle T(\hat{y}_i), \lambda(w, \hat{x}_i) \rangle \right),
 \end{aligned}$$

where we used  $\hat{p}_c = N_c/N$ . Therefore  $w_{MLE}$  solves  $\min_{w \in \mathcal{W}} \mathbb{E}_{\hat{\mathbb{P}}}[\ell_\lambda(X, Y, w)]$ . □

*Proof of Example 2.3.* We find

$$\begin{aligned}
 \min_{w \in \mathcal{W}} \mathbb{E}_{\hat{\mathbb{P}}}[\ell_\lambda(X, Y, w)] &= \min_{w \in \mathcal{W}} \sum_{c=1}^C \hat{p}_c \left( \Psi(\lambda(w, \hat{x}_c)) - \langle \mathbb{E}_{\hat{\mathbb{P}}_{Y|\hat{x}_c}}[T(Y)], \lambda(w, \hat{x}_c) \rangle \right) \\
 &\geq \sum_{c=1}^C \hat{p}_c \min_{w_c \in \mathcal{W}} \left( \Psi(\lambda(w_c, \hat{x}_c)) - \langle \mathbb{E}_{\hat{\mathbb{P}}_{Y|\hat{x}_c}}[T(Y)], \lambda(w_c, \hat{x}_c) \rangle \right) \\
 &= \sum_{c=1}^C \hat{p}_c \left( \Psi(\lambda(w_{MLE}, \hat{x}_c)) - \langle \mathbb{E}_{\hat{\mathbb{P}}_{Y|\hat{x}_c}}[T(Y)], \lambda(w_{MLE}, \hat{x}_c) \rangle \right),
 \end{aligned}$$

where the first equality follows from the definition of the log-loss function  $\ell_\lambda$ , the inequality follows because  $\hat{p}_c > 0$ , and the last equality follows because of the convex conjugate relationship that implies the optimal solution  $w_c^*$  should satisfy

$$\nabla \Psi(\lambda(w_c^*, \hat{x}_c)) = \mathbb{E}_{\hat{\mathbb{P}}_{Y|\hat{x}_c}}[T(Y)] = \nabla \Psi(\lambda(w_{MLE}, \hat{x}_c)) \implies w_c^* = w_{MLE}.$$

This implies that  $w_{MLE}$  solves  $\min_{w \in \mathcal{W}} \mathbb{E}_{\hat{\mathbb{P}}}[\ell_\lambda(X, Y, w)]$  and completes the proof.  $\square$

*Proof of Proposition 2.6.* Fix any set of conditional radii  $\rho \in \mathbb{R}_+^C$ . If  $\mathbb{B}_{\varepsilon, \rho}(\hat{\mathbb{P}})$  is empty then it is trivial that  $\mathbb{B}_{\varepsilon, \rho}(\hat{\mathbb{P}}) \subset \mathcal{B}_\varepsilon(\hat{\mathbb{P}})$ . Suppose that  $\mathbb{B}_{\varepsilon, \rho}(\hat{\mathbb{P}})$  is non-empty and pick any  $\mathbb{Q} \in \mathbb{B}_{\varepsilon, \rho}(\hat{\mathbb{P}})$ . By definition of the set  $\mathbb{B}_{\varepsilon, \rho}(\hat{\mathbb{P}})$ ,  $\mathbb{Q}$  can be decomposed into a marginal  $\mathbb{Q}_X$  and a collection of conditional measures  $\mathbb{Q}_{Y|\hat{x}_c}$ . Furthermore, because  $\varepsilon$  is finite, the marginal  $\mathbb{Q}_X$  should be absolutely continuous with respect to  $\hat{\mathbb{P}}_X$ . We have

$$\begin{aligned} \text{KL}(\mathbb{Q} \parallel \hat{\mathbb{P}}) &= \text{KL}(\mathbb{Q}_X \parallel \hat{\mathbb{P}}_X) + \mathbb{E}_{\mathbb{Q}_X}[\text{KL}(\mathbb{Q}_{Y|X} \parallel \hat{\mathbb{P}}_{Y|X})] \\ &\leq \text{KL}(\mathbb{Q}_X \parallel \hat{\mathbb{P}}_X) + \mathbb{E}_{\mathbb{Q}_X}[\sum_{c=1}^C \rho_c \mathbb{1}_{\hat{x}_c}(X)] \leq \varepsilon, \end{aligned}$$

where the equality is from the chain rule of the conditional relative entropy [10, Lemma 7.9]. The first inequality follows from the fact that  $\text{KL}(\mathbb{Q}_{Y|\hat{x}_c} \parallel \hat{\mathbb{P}}_{Y|\hat{x}_c}) \leq \rho_c$  for every  $c$ . The second inequality follows from the last constraint defining the set  $\mathbb{B}_{\varepsilon, \rho}(\hat{\mathbb{P}})$ . This implies that  $\mathbb{Q} \in \mathcal{B}_\varepsilon(\hat{\mathbb{P}})$ , and because  $\mathbb{Q}$  was chosen arbitrarily, we have  $\mathbb{B}_{\varepsilon, \rho} \subseteq \mathcal{B}_\varepsilon(\hat{\mathbb{P}})$ . As a consequence,  $\bigcup_{\rho \in \mathbb{R}_+^C} \mathbb{B}_{\varepsilon, \rho}(\hat{\mathbb{P}}) \subseteq \mathcal{B}_\varepsilon(\hat{\mathbb{P}})$ .

Regarding the reverse relation, pick an arbitrary  $\mathbb{Q} \in \mathcal{B}_\varepsilon(\hat{\mathbb{P}})$  which admits the decomposition into a marginal  $\mathbb{Q}_X$  and conditional measures  $\mathbb{Q}_{Y|\hat{x}_c}$ . By setting the conditional radii  $\rho \in \mathbb{R}_+^C$  with  $\rho_c = \text{KL}(\mathbb{Q}_{Y|\hat{x}_c} \parallel \hat{\mathbb{P}}_{Y|\hat{x}_c})$  for every  $c$ , one can verify using the chain rule of the conditional relative entropy that  $\mathbb{Q} \in \mathbb{B}_{\varepsilon, \rho}(\hat{\mathbb{P}})$ . This implies that  $\mathbb{B}_{\varepsilon, \rho}(\hat{\mathbb{P}}) \subseteq \bigcup_{\rho \in \mathbb{R}_+^C} \mathbb{B}_{\varepsilon, \rho}(\hat{\mathbb{P}})$ .

Concerning the last statement, notice that the condition  $\sum_{c=1}^C \hat{p}_c \rho_c \leq \varepsilon$  implies that  $\hat{\mathbb{P}} \in \mathbb{B}_{\varepsilon, \rho}(\hat{\mathbb{P}})$  and thus  $\mathbb{B}_{\varepsilon, \rho}(\hat{\mathbb{P}})$  is non-empty. The proof is complete.  $\square$

## B Proofs of Section 3

The proof of Proposition 3.1 relies on the following preliminary result.

**Lemma B.1.** Let  $\hat{p} \in \mathbb{R}_{++}^C$  be a probability vector summing up to one. For any  $\varepsilon \in \mathbb{R}_+$  and  $\rho \in \mathbb{R}_+^C$  satisfying  $\sum_{c=1}^C \hat{p}_c \rho_c \leq \varepsilon$ , the finite dimensional set

$$\mathcal{Q} \triangleq \left\{ q \in \mathbb{R}_+^C : \sum_{c=1}^C q_c = 1, \sum_{c=1}^C q_c (\log q_c - \log \hat{p}_c + \rho_c) \leq \varepsilon \right\} \quad (\text{A.1})$$

is compact and convex. Moreover, the support function  $h_{\mathcal{Q}}$  of  $\mathcal{Q}$  satisfies

$$\forall t \in \mathbb{R}^C : \quad h_{\mathcal{Q}}(t) \triangleq \sup_{q \in \mathcal{Q}} q^\top t = \inf_{\alpha \in \mathbb{R}, \beta \in \mathbb{R}_{++}} \left\{ \alpha + \beta \varepsilon + \beta \sum_{c=1}^C \hat{p}_c \exp\left(\frac{t_c - \alpha}{\beta} - \rho_c - 1\right) \right\}.$$

*Proof of Lemma B.1.* The function  $\mathbb{R}_+^C \ni q \mapsto \sum_{c=1}^C q_c (\log q_c - \log \hat{p}_c + \rho_c) \in \mathbb{R}_+$  is continuous and convex, hence, the set  $\{q \in \mathbb{R}_+^C : \sum_{c=1}^C q_c (\log q_c - \log \hat{p}_c + \rho_c) \leq \varepsilon\}$  is closed and convex. Consequentially,  $\mathcal{Q}$  can be written as the intersection between a simplex (thus compact and convex) and a closed, convex set, so  $\mathcal{Q}$  is compact and convex.

The proof of the support function of  $\mathcal{Q}$  proceeds in 2 steps. First, we prove the support function for the  $\varepsilon$ -inflated set

$$\mathcal{Q}_\varepsilon = \left\{ q \in \mathbb{R}_+^C : \sum_{c=1}^C q_c = 1, \sum_{c=1}^C q_c (\log q_c - \log \hat{p}_c + \rho_c) \leq \varepsilon + \epsilon \right\}$$

with the right-hand side of the last constraint being inflated with  $\epsilon \in \mathbb{R}_{++}$ . In the second step, we use a limit argument to show that the support function of  $\mathcal{Q}$  is attained as the limit of the support function of  $\mathcal{Q}_\epsilon$  as  $\epsilon$  tends to 0.

Reminding that  $\Delta$  is the  $C$ -dimensional simplex. For any  $t \in \mathbb{R}^C$  and any  $\epsilon \in \mathbb{R}_{++}$ , by the definition of the support function, we have for every  $t \in \mathbb{R}^C$

$$h_{\mathcal{Q}_\epsilon}(t) = \begin{cases} \sup & q^\top t \\ \text{s. t.} & q \in \Delta, \sum_{c=1}^C q_c (\log q_c - \log \hat{p}_c + \rho_c) \leq \epsilon + \epsilon \end{cases} \quad (\text{A.2a})$$

$$\begin{aligned} &= \sup_{q \in \Delta} \inf_{\beta \in \mathbb{R}_+} q^\top t + \beta(\epsilon + \epsilon - \sum_{c=1}^C q_c (\log q_c - \log \hat{p}_c + \rho_c)) \\ &= \inf_{\beta \in \mathbb{R}_+} \sup_{q \in \Delta} q^\top t + \beta(\epsilon + \epsilon - \sum_{c=1}^C q_c (\log q_c - \log \hat{p}_c + \rho_c)), \end{aligned} \quad (\text{A.2b})$$

where the interchange of the sup-inf operators in (A.2b) is justified by strong duality [6, Proposition 5.3.1] because  $\hat{p}$  constitutes a Slater point of the set  $\mathcal{Q}_\epsilon$ . By Berge's maximum theorem [5], the optimal value of the inner supremum problem is a continuous function in  $\beta$  because the simplex  $\Delta$  is compact and the objective function is continuous in the decision variable  $q$ . As a consequence, we can restrict  $\beta \in \mathbb{R}_{++}$  without any loss of optimality. Because  $\Delta$  is prescribed using linear constraints, strong duality implies that

$$\begin{aligned} h_{\mathcal{Q}_\epsilon}(t) &= \inf_{\alpha \in \mathbb{R}, \beta \in \mathbb{R}_{++}} \left\{ \alpha + \beta(\epsilon + \epsilon) + \sup_{q \in \mathbb{R}_+^C} \sum_{c=1}^C q_c (t_c - \alpha + \beta \log \hat{p}_c - \beta \rho_c - \beta \log q_c) \right\} \\ &= \inf_{\alpha \in \mathbb{R}, \beta \in \mathbb{R}_{++}} \left\{ \alpha + \beta(\epsilon + \epsilon) + \sum_{c=1}^C \sup_{q_c \in \mathbb{R}_+} q_c (t_c - \alpha + \beta \log \hat{p}_c - \beta \rho_c - \beta \log q_c) \right\}, \end{aligned}$$

where the last equality holds because the supremum problem is separable in each decision variable  $q_c$ . It now follows from the first-order optimality condition that the maximizer  $q_c^*$  is

$$q_c^* = \exp \left( \frac{t_c - \alpha + \beta \log \hat{p}_c - \beta \rho_c - \beta}{\beta} \right) > 0,$$

and by substituting this maximizer into the objective function, the value of the support function  $h_{\mathcal{Q}_\epsilon}(t)$  is then equal to the optimal value of the below optimization problem

$$\inf_{\alpha \in \mathbb{R}, \beta \in \mathbb{R}_{++}} \alpha + \beta(\epsilon + \epsilon) + \beta \sum_{c=1}^C \hat{p}_c \exp \left( \frac{t_c - \alpha}{\beta} - \rho_c - 1 \right).$$

We now proceed to the second step. Denote temporarily the objective function of the above problem as  $G(\epsilon, \gamma)$ , where  $\gamma = [\alpha; \beta]$  combines both dual variables  $\alpha$  and  $\beta$ . Define the function

$$g(\epsilon) = \inf_{\gamma \in \Gamma} G(\epsilon, \gamma), \quad \text{with } \Gamma \triangleq \mathbb{R} \times \mathbb{R}_{++}.$$

Because  $G$  is continuous, [11, Lemma 2.7] implies that  $g$  is upper-semicontinuous at 0. Furthermore,  $G$  is calm from below at  $\epsilon = 0$  because  $G(\epsilon, \gamma) - G(0, \gamma) = \beta\epsilon \geq 0$ , thus [11, Lemma 2.7] implies that  $g$  is lower-semicontinuous at 0. These two facts lead to the continuity of  $g$  at 0. From the first part of the proof, we have  $g(\epsilon) = h_{\mathcal{Q}_\epsilon}(t)$  for any  $\epsilon \in \mathbb{R}_+$ . Moreover, by applying Berge's maximum theorem [5] to (A.2a),  $h_{\mathcal{Q}_\epsilon}(t)$  is a continuous function of  $\epsilon$  over  $\mathbb{R}_+$ . Thus we find

$$h_{\mathcal{Q}}(t) = h_{\mathcal{Q}_0}(t) = \lim_{\epsilon \downarrow 0} h_{\mathcal{Q}_\epsilon}(t) = \lim_{\epsilon \downarrow 0} g(\epsilon) = g(0),$$

where the chain of equalities follows from the definition of  $\mathcal{Q}_\epsilon$ , the continuity of  $h_{\mathcal{Q}_\epsilon}(t)$  in  $\epsilon$ , the fact that  $g(\epsilon) = h_{\mathcal{Q}_\epsilon}(t)$  for  $\epsilon > 0$ , and the continuity of  $g$  at 0 established previously. The proof is now completed.  $\square$

*Proof of Proposition 3.1.* To facilitate the proof, we define the following ambiguity set over the marginal distribution of the covariate  $X$  as

$$\mathbb{B}_X \triangleq \left\{ \mathbb{Q}_X \in \mathcal{M}(\mathcal{X}) : \text{KL}(\mathbb{Q}_X \parallel \hat{\mathbb{P}}_X) + \mathbb{E}_{\mathbb{Q}_X} \left[ \sum_{c=1}^C \rho_c \mathbb{1}_{\hat{x}_c}(X) \right] \leq \varepsilon \right\}.$$

Given a nominal marginal distribution  $\hat{\mathbb{P}}_X$  supported on a finite set  $\{\hat{x}_c\}_{c \in \mathcal{C}}$ , the absolute continuity requirement suggests that  $\text{KL}(\mathbb{Q}_X \parallel \hat{\mathbb{P}}_X)$  is finite if and only if  $\mathbb{Q}_X$  is absolutely continuous with respect to  $\hat{\mathbb{P}}_X$ . Thus, any  $\mathbb{Q}_X$  of interest should be supported on the same set  $\{\hat{x}_c\}_{c=1, \dots, C}$ , and  $\mathbb{Q}_X$  can be finitely parametrized by a  $C$ -dimensional vector  $\{q_c\}_{c=1, \dots, C}$ . Let  $\mathcal{Q}$  denote the convex compact feasible set in  $\mathbb{R}^C$ , that is,

$$\mathcal{Q} \triangleq \left\{ q \in \mathbb{R}_+^C : \sum_{c=1}^C q_c = 1, \sum_{c=1}^C q_c (\log q_c - \log \hat{p}_c + \rho_c) \leq \varepsilon \right\},$$

and the ambiguity set  $\mathbb{B}_X$  can now be finitely parametrized as

$$\mathbb{B}_X = \left\{ \mathbb{Q}_X \in \mathcal{M}(\mathcal{X}) : \exists q \in \mathcal{Q}, \mathbb{Q}_X = \sum_{i=1}^C q_i \delta_{\hat{x}_i} \right\}.$$

By coupling  $\mathbb{B}_X$  with the conditional ambiguity sets  $\mathbb{B}_{Y|\hat{x}_c}$ ,  $\mathbb{B}(\hat{\mathbb{P}})$  can be re-written as

$$\mathbb{B}(\hat{\mathbb{P}}) = \left\{ \mathbb{Q} \in \mathcal{M}(\mathcal{X} \times \mathcal{Y}) : \begin{array}{l} \exists \mathbb{Q}_X \in \mathbb{B}_X, \mathbb{Q}_{Y|\hat{x}_c} \in \mathbb{B}_{Y|\hat{x}_c} \quad \forall c = 1, \dots, C \\ \mathbb{Q}(\{\hat{x}_c\} \times A) = \mathbb{Q}_X(\{\hat{x}_c\}) \mathbb{Q}_{Y|\hat{x}_c}(A) \quad \forall A \in \mathcal{F}(\mathcal{Y}) \quad \forall c = 1, \dots, C \end{array} \right\}$$

The worst-case expected loss becomes

$$\begin{aligned} \sup_{\mathbb{Q} \in \mathbb{B}(\hat{\mathbb{P}})} \mathbb{E}_{\mathbb{Q}}[L(X, Y)] &= \sup_{\mathbb{Q}_X \in \mathbb{B}_X} \mathbb{E}_{\mathbb{Q}_X} \left[ \sup_{\mathbb{Q}_{Y|X} \in \mathbb{B}_{Y|X}} \mathbb{E}_{\mathbb{Q}_{Y|X}} [L(X, Y)] \right] \\ &= \sup_{q \in \mathcal{Q}} \sum_{c=1}^C q_c \sup_{\mathbb{Q}_{Y|\hat{x}_c} \in \mathbb{B}_{Y|\hat{x}_c}} \mathbb{E}_{\mathbb{Q}_{Y|\hat{x}_c}} [L(\hat{x}_c, Y)], \end{aligned}$$

where the first equality follows from the law of total expectation, and the second equality follows from the finite reparametrization of  $\mathbb{B}_X$ . If we denote by  $\mathcal{T}$  the epigraph reformulation of the worst-case conditional expectations

$$\mathcal{T} \triangleq \left\{ t \in \mathbb{R}^C : \sup_{\mathbb{Q}_{Y|\hat{x}_c} \in \mathbb{B}_{Y|\hat{x}_c}} \mathbb{E}_{\mathbb{Q}_{Y|\hat{x}_c}} [L(\hat{x}_c, Y)] \leq t_c \quad \forall c = 1, \dots, C \right\},$$

then the worst-case expected loss can be further re-expressed as

$$\sup_{\mathbb{Q} \in \mathbb{B}(\hat{\mathbb{P}})} \mathbb{E}_{\mathbb{Q}}[L(X, Y)] = \sup_{q \in \mathcal{Q}} \inf_{t \in \mathcal{T}} q^\top t \tag{A.3a}$$

$$= \inf_{t \in \mathcal{T}} \sup_{q \in \mathcal{Q}} q^\top t \tag{A.3b}$$

$$= \begin{cases} \inf & \alpha + \beta \varepsilon + \beta \sum_{c=1}^C \hat{p}_c \exp \left( \frac{t_c - \alpha}{\beta} - \rho_c - 1 \right) \\ \text{s. t.} & t \in \mathcal{T}, \alpha \in \mathbb{R}, \beta \in \mathbb{R}_{++}, \end{cases} \tag{A.3c}$$

where the sup-inf formulation (A.3a) is justified because  $q$  is non-negative and we can resort to the epigraph formulations of the worst-case conditional expected loss. In (A.3b) we applied Sion's minimax theorem [13], which is valid because the sup-inf program (A.3a) is a concave-convex saddle problem, and  $\mathcal{Q}$  is convex and compact and  $\mathcal{T}$  is convex. In (A.3c) we have used Lemma B.1 to reformulate the supremum over  $q$ . The claim then follows.  $\square$

Instead of solving the problem in the natural parameters  $\theta$  coupled with its log-partition function  $\Psi$ , we will use the reparametrization to the mean parameters using the conjugate function of  $\Psi$ . More specifically, let  $\phi$  be the convex conjugate of  $\Psi$ , that is,

$$\phi : \mu \mapsto \sup_{\theta \in \Theta} \{ \langle \mu, \theta \rangle - \Psi(\theta) \}$$

Before proceeding to the technical proofs, the below lemma collects from the existing literature the necessary background knowledge about the log-partition function  $\Psi$  and its conjugate  $\phi$ , along with the relationship between the natural parameter  $\theta$  and its corresponding expectation parameter  $\mu$ .

**Lemma B.2** (Relevant facts). The following assertions hold for regular exponential family.

- (i) The function  $\phi$  is closed, convex and proper on  $\mathbb{R}^p$ .
- (ii)  $(\Theta, \Psi)$  and  $(\text{int}(\text{dom}(\phi)), \phi)$  are convex functions of Legendre type, and they are Legendre duals of each other.
- (iii) The gradient function  $\nabla\Psi$  is a one-to-one function from the open convex set  $\Theta$  onto the open convex set  $\text{int}(\text{dom}(\phi))$ .
- (iv) The gradient functions  $\nabla\Psi$  and  $\nabla\phi$  are continuous, and  $\nabla\phi = (\nabla\Psi)^{-1}$ .
- (v) The function  $\phi$  is essentially smooth over  $\text{int}(\text{dom}(\phi))$ .

*Proof of Lemma B.2.* Assertion (i) holds since  $\langle \mu, \theta \rangle - \Psi(\theta)$  is convex and closed for each  $\theta$ , thus taking supremum,  $\phi$  is convex and closed.  $\phi$  is proper since  $\text{dom}(\phi)$  is non-empty. Assertions (ii) to (iv) follows from [3, Lemma 1] and [3, Theorem 2]. Assertion (v) follows from [3, Lemma 1] and [12, Theorem 26.3], and the fact that  $\Psi$  and  $\phi$  is a convex conjugate pair.  $\square$

From Assertion (ii), we have the mappings between the dual spaces  $\text{int}(\text{dom}(\phi))$  and  $\Theta$  are given by the Legendre transformation

$$\mu(\theta) = \nabla\Psi(\theta) \quad \text{and} \quad \theta(\mu) = \nabla\phi(\mu).$$

For any  $\mu \in \text{int}(\text{dom}(\phi))$ , the conjugate function  $\phi$  can be expressed as

$$\phi(\mu) = \langle \mu, \theta(\mu) \rangle - \Psi(\theta(\mu)).$$

**Lemma B.3** (KL divergence between distributions from exponential family). Suppose that  $\mathbb{Q}_1$  and  $\mathbb{Q}_2$  belong to the exponential family of distributions with the same log-partition function  $\Psi$  and with natural parameters  $\theta_1$  and  $\theta_2$  respectively. The KL divergence from  $\mathbb{Q}_1$  to  $\mathbb{Q}_2$  amounts to

$$\text{KL}(\mathbb{Q}_1 \parallel \mathbb{Q}_2) = \langle \theta_1 - \theta_2, \mu_1 \rangle - \Psi(\theta_1) + \Psi(\theta_2) = \phi(\mu_1) - \phi(\mu_2) - \langle \mu_1 - \mu_2, \theta_2 \rangle,$$

where  $\phi$  is the convex conjugate of  $\Psi$ , and  $\mu_j = \nabla\Psi(\theta_j)$  for any  $j \in \{1, 2\}$ .

The result of Lemma B.3 can be found in [3, Appendix A], but the explicit proof is included here for completeness.

*Proof of Lemma B.3.* One finds

$$\begin{aligned} \text{KL}(\mathbb{Q}_1 \parallel \mathbb{Q}_2) &= \mathbb{E}_{\mathbb{Q}_1}[\log(d\mathbb{Q}_1/d\mathbb{Q}_2)] \\ &= \mathbb{E}_{\mathbb{Q}_1}[\langle T(Y), \theta_1 - \theta_2 \rangle - \Psi(\theta_1) + \Psi(\theta_2)] \end{aligned} \tag{A.4a}$$

$$= \langle \mu_1, \theta_1 - \theta_2 \rangle - \Psi(\theta_1) + \Psi(\theta_2), \tag{A.4b}$$

where equality (A.4a) follows by calculating the logarithm of the Radon-Nikodym derivatives between two distributions, and equality (A.4b) follows by noting that  $\mu_1 = \mathbb{E}_{\mathbb{Q}_1}[T(Y)]$ .

By [3, Theorem 4], one can also rewrite the density using the mean parameter  $\mu = \mu(\theta)$  as

$$\begin{aligned} f(y|\mu) &= h(y) \exp(\langle \theta, T(y) \rangle - \Psi(\theta)) \\ &= h(y) \exp(\phi(\mu) + \langle T(y) - \mu, \nabla\phi(\mu) \rangle) \end{aligned}$$

The KL divergence from  $\mathbb{Q}_1$  to  $\mathbb{Q}_2$  amounts to

$$\begin{aligned} \text{KL}(\mathbb{Q}_1 \parallel \mathbb{Q}_2) &= \mathbb{E}_{\mathbb{Q}_1}[\log(d\mathbb{Q}_1/d\mathbb{Q}_2)] \\ &= \mathbb{E}_{\mathbb{Q}_1}[\phi(\mu_1) - \phi(\mu_2) + \langle T(Y), \nabla\phi(\mu_1) - \nabla\phi(\mu_2) \rangle - \langle \mu_1, \nabla\phi(\mu_1) \rangle + \langle \mu_2, \nabla\phi(\mu_2) \rangle] \\ &= \langle \mu_2 - \mu_1, \theta_2 \rangle + \phi(\mu_1) - \phi(\mu_2). \end{aligned} \tag{A.5a} \tag{A.5b}$$

From Assertion (iv) in Lemma B.2, we notice that  $\theta_2 = \nabla\phi(\mu_2)$ , which completes the proof.  $\square$

Recall that the conditional ambiguity set defined in (8) is

$$\mathbb{B}_{Y|\hat{x}_c} \triangleq \left\{ \mathbb{Q}_{Y|\hat{x}_c} \in \mathcal{M}(\mathcal{Y}) : \exists \theta \in \Theta, \mathbb{Q}_{Y|\hat{x}_c}(\cdot) \sim f(\cdot|\theta), \text{KL}(\mathbb{Q}_{Y|\hat{x}_c} \parallel \hat{\mathbb{P}}_{Y|\hat{x}_c}) \leq \rho_c \right\}$$

for a parametric, nominal conditional measure  $\hat{\mathbb{P}}_{Y|\hat{x}_c} \sim f(\cdot|\hat{\theta}_c)$ ,  $\hat{\theta}_c \in \Theta$  and a radius  $\rho_c \in \mathbb{R}_+$ . The uncertainty set  $\mathcal{S}_c$  of expectation parameters induced by the ambiguity set  $\mathbb{B}_{Y|\hat{x}_c}$  is defined as

$$\mathcal{S}_c \triangleq \left\{ \mu \in \text{dom}(\phi) : \exists \mathbb{Q}_{Y|\hat{x}_c} \in \mathbb{B}_{Y|\hat{x}_c}, \mu = \mathbb{E}_{\mathbb{Q}_{Y|\hat{x}_c}}[T(Y)] \right\}.$$

**Lemma B.4** (Compactness of expectation parameter uncertainty set). The set  $\mathcal{S}_c$  is compact, and it has an interior point whenever  $\rho_c > 0$ .

*Proof of Lemma B.4.* By Lemma B.3 and the definition of the set  $\mathcal{S}_c$ , we can write  $\mathcal{S}_c$  as

$$\mathcal{S}_c = \left\{ \mu \in \text{dom}(\phi) : \phi(\mu) - \phi(\hat{\mu}_c) - \langle \mu - \hat{\mu}_c, \hat{\theta}_c \rangle \leq \rho_c \right\}.$$

Because  $\phi$  is closed, convex, proper, and that  $\hat{\theta}_c \in \text{int}(\Theta) = \Theta$ , the function  $\phi(\cdot) - \langle \cdot, \hat{\theta}_c \rangle$  is coercive by [12, Corollary 14.2.2] and [4, Fact 2.11]. As a consequence,  $\mathcal{S}_c$  is bounded.

Because  $\Psi$  is essentially strictly convex on  $\Theta$ ,  $\phi$  is essentially smooth on  $\text{int}(\text{dom}(\phi))$  by [12, Theorem 26.3]. [4, Theorem 3.8] now implies that if  $\mu'$  is a boundary point of  $\text{int}(\text{dom}(\phi))$  then as  $\text{int}(\text{dom}(\phi)) \ni \mu_k \xrightarrow{k \rightarrow \infty} \mu'$  then  $\phi(\mu_k) - \langle \mu_k, \hat{\theta}_c \rangle \xrightarrow{k \rightarrow \infty} +\infty$ . Moreover, because  $\phi$  is continuous over  $\text{int}(\text{dom}(\phi))$ , the set  $\mathcal{S}_c$  is closed. This implies that  $\mathcal{S}_c$ , being a closed and bounded set of finite dimension, is compact.

The continuity of  $\phi$  leads a straightforward manner to the non-empty interior of  $\mathcal{S}_c$  when  $\rho_c > 0$ . This observation completes the proof.  $\square$

*Proof of Proposition 3.2.* Because  $\lambda$  is a mapping onto the space  $\Theta$  of natural parameters, we use the shorthand  $\lambda_c = \lambda(w, \hat{x}_c) \in \Theta$ . Moreover, let  $\hat{\mu}_c = \nabla \Psi(\hat{\theta}_c)$ . The worst-case conditional expectation of the log-loss function becomes

$$\begin{aligned} \sup_{\mathbb{Q}_{Y|\hat{x}_c} \in \mathbb{B}_{Y|\hat{x}_c}} \mathbb{E}_{\mathbb{Q}_{Y|\hat{x}_c}}[\ell_\lambda(\hat{x}_c, Y, w)] &= \sup_{\mathbb{Q}_{Y|\hat{x}_c} \in \mathbb{B}_{Y|\hat{x}_c}} \mathbb{E}_{\mathbb{Q}_{Y|\hat{x}_c}}[\Psi(\lambda(w, \hat{x}_c)) - \langle T(Y), \lambda(w, \hat{x}_c) \rangle] \\ &= \sup_{\mathbb{Q}_{Y|\hat{x}_c} \in \mathbb{B}_{Y|\hat{x}_c}} \Psi(\lambda(w, \hat{x}_c)) - \langle \mathbb{E}_{\mathbb{Q}_{Y|\hat{x}_c}}[T(Y)], \lambda(w, \hat{x}_c) \rangle \\ &= \begin{cases} \sup & \Psi(\lambda_c) - \langle \mu, \lambda_c \rangle \\ \text{s. t.} & \phi(\mu) - \phi(\hat{\mu}_c) - \langle \mu - \hat{\mu}_c, \hat{\theta}_c \rangle \leq \rho_c, \end{cases} \end{aligned}$$

where the first equality is from the definition of  $\ell_\lambda$  and the second equality follows from the linearity of the expectation operator. The last equality follows from the definition of the ambiguity set  $\mathbb{B}_{Y|\hat{x}_c}$  using the  $\phi$  function by Lemma B.3. Because the term  $\Psi(\lambda_c)$  does not involve the decision variable  $\mu$ , it suffices now to consider the optimization problem

$$\sup \left\{ \langle -\lambda_c, \mu \rangle : \phi(\mu) - \langle \mu, \hat{\theta}_c \rangle \leq \rho_c + \phi(\hat{\mu}_c) - \langle \hat{\mu}_c, \hat{\theta}_c \rangle \right\}. \quad (\text{A.7})$$

Suppose at this moment that  $\lambda_c \neq 0$  and  $\rho_c > 0$ . When  $\rho_c > 0$ , the feasible set of (A.7) satisfies the Slater condition because  $\phi$  is a continuous function. Hence, by a strong duality argument, the convex optimization problem (A.7) is equivalent to

$$\sup_{\mu} \inf_{\gamma \geq 0} \left\{ \langle -\lambda_c, \mu \rangle + \gamma(\bar{\rho}_c - \phi(\mu) + \langle \mu, \hat{\theta}_c \rangle) \right\} = \inf_{\gamma \geq 0} \left\{ \gamma \bar{\rho}_c + \sup_{\mu} \langle \mu, \gamma \hat{\theta}_c - \lambda_c \rangle - \gamma \phi(\mu) \right\},$$

where  $\bar{\rho}_c \triangleq \rho_c + \phi(\hat{\mu}_c) - \langle \hat{\mu}_c, \hat{\theta}_c \rangle \in \mathbb{R}$  and the interchange of the supremum and the infimum operators is justified thanks to [6, Proposition 5.3.1]. Consider now the infimum problem on the right hand side of the above equation. If  $\gamma = 0$ , then the inner supremum subproblem on the right hand side is unbounded because  $\lambda_c \neq 0$ , thus  $\gamma = 0$  is never an optimal solution to the infimum problem. By utilizing the definition of the conjugate function, one thus deduce that problem (A.7) is equivalent to

$$\inf_{\gamma > 0} \gamma \bar{\rho}_c + (\gamma \phi)^*(\gamma \hat{\theta}_c - \lambda_c) = \inf_{\gamma > 0} \gamma \bar{\rho}_c + \gamma \phi^*\left(\hat{\theta}_c - \frac{\lambda_c}{\gamma}\right), \quad (\text{A.8})$$

where the equality exploits the fact that  $(\gamma\phi)^*(\theta) = \gamma\phi^*(\theta/\gamma)$  for any  $\gamma > 0$  [7, Table 3.2].

We now show that the reformulation problem (A.8) is valid when  $\rho_c = 0$ . Indeed, when  $\rho_c = 0$ , problem (A.7) has a unique feasible solution  $\hat{\mu}_c$ , thus its optimal value is  $\langle -\lambda_c, \hat{\mu}_c \rangle$ . Moreover, in this case, problem (A.8) becomes

$$\inf_{\gamma > 0} \gamma \left[ \phi(\hat{\mu}_c) - \langle \hat{\mu}_c, \hat{\theta}_c \rangle + \phi^* \left( \hat{\theta}_c - \frac{\lambda_c}{\gamma} \right) \right] \\ = \langle -\lambda_c, \hat{\mu}_c \rangle + \inf_{\gamma > 0} \gamma \left[ \phi(\hat{\mu}_c) - \langle \hat{\mu}_c, \hat{\theta}_c - \frac{\lambda_c}{\gamma} \rangle + \phi^* \left( \hat{\theta}_c - \frac{\lambda_c}{\gamma} \right) \right].$$

Notice that the term in the square bracket of the optimization problem on the right hand side is non-negative by the definition of the conjugate function. Thus, the infimum problem over  $\gamma$  admits the optimal value of 0 as  $\gamma$  tends to  $+\infty$ . As a consequence, when  $\rho_c = 0$ , both problem (A.7) and (A.8) have the same optimal value and they are equivalent.

Consider now the situation where  $\lambda_c = 0$ . In this case, problem (A.8) becomes

$$\inf_{\gamma > 0} \gamma \rho_c + \gamma \left( \phi(\hat{\mu}_c) - \langle \hat{\mu}_c, \hat{\theta}_c \rangle + \phi^*(\hat{\theta}_c) \right).$$

By definition of the conjugate function, we have  $\phi^*(\hat{\theta}_c) \geq \langle \hat{\mu}_c, \hat{\theta}_c \rangle - \phi(\hat{\mu}_c)$ , and thus, by combining with the fact that  $\rho_c \geq 0$ , this infimum problem will admit the optimal value of 0. Notice that when  $\lambda_c = 0$ , the optimal value of problem (A.7) is also 0. This shows that (A.8) is equivalent to (A.7) for any possible value of  $\lambda_c$ . Replacing  $\phi^*$  in (A.8) by its equivalence  $\Psi$  and substituting  $\langle \hat{\mu}_c, \hat{\theta}_c \rangle - \phi(\hat{\mu}_c)$  by its equivalence  $\Psi(\hat{\theta}_c)$  complete the reformulation (10).  $\square$

*Proof of Theorem 3.3.* By applying Proposition 3.1, the distributionally robust MLE problem (4) can be reformulated as

$$\min_{w \in \mathcal{W}} \max_{\mathbb{Q} \in \mathbb{B}(\hat{\mathbb{P}})} \mathbb{E}_{\mathbb{Q}} [\ell_{\lambda}(X, Y, w)] = \begin{cases} \inf & \alpha + \beta \varepsilon + \beta \sum_{c=1}^C \hat{p}_c \exp \left( \frac{t_c - \alpha}{\beta} - \rho_c - 1 \right) \\ \text{s. t.} & w \in \mathcal{W}, t \in \mathbb{R}^C, \alpha \in \mathbb{R}, \beta \in \mathbb{R}_{++} \\ & \sup_{\mathbb{Q}_{Y|\hat{x}_c} \in \mathbb{B}_{Y|\hat{x}_c}} \mathbb{E}_{\mathbb{Q}_{Y|\hat{x}_c}} [\ell_{\lambda}(\hat{x}_c, Y, w)] \leq t_c \quad \forall c = 1, \dots, C. \end{cases}$$

Using Proposition 3.2 to reformulate each constraint of the above optimization problem leads to the desired result.  $\square$

## C Proofs of Section 4

*Proof of Proposition 4.1.* Let  $\mathbb{1}$  denote the  $N$  dimensional vector of all 1's. Let  $\text{KL}(q \parallel p) = \sum_{i=1}^N q_i \log(q_i/p_i)$ , we have

$$\sup_{\mathbb{Q}: \text{KL}(\mathbb{Q} \parallel \hat{\mathbb{P}}^{\text{emp}}) \leq \varepsilon} \mathbb{E}_{\mathbb{Q}} [\ell_{\lambda}(X, Y, w)] = \sup_{q: \text{KL}(q \parallel \frac{1}{N} \mathbb{1}) \leq \varepsilon} \sum_{i=1}^N q_i \ell_{\lambda}(\hat{x}_i, \hat{y}_i, w) \\ = \sup_{q: \text{KL}(q \parallel \frac{1}{N} \mathbb{1}) \leq \varepsilon} \sum_{i=1}^N q_i \left( \Psi(\lambda(w, \hat{x}_i)) - \langle T(\hat{y}_i), \lambda(w, \hat{x}_i) \rangle \right).$$

On the other hand, we note

$$\sup_{\mathbb{Q} \in \mathbb{B}(\hat{\mathbb{P}})} \mathbb{E}_{\mathbb{Q}} [\ell_{\lambda}(X, Y, w)] = \sup_{q: \text{KL}(q \parallel \frac{1}{N} \mathbb{1}) \leq \varepsilon} \sum_{i=1}^N q_i \mathbb{E}_{\mathbb{Q}_{Y|\hat{x}_i}} [\ell_{\lambda}(\hat{x}_i, Y, w)] \\ = \sup_{q: \text{KL}(q \parallel \frac{1}{N} \mathbb{1}) \leq \varepsilon} \sum_{i=1}^N q_i \left( \Psi(\lambda(w, \hat{x}_i)) - \langle \nabla \Psi(\hat{\theta}_i), \lambda(w, \hat{x}_i) \rangle \right) \\ = \sup_{q: \text{KL}(q \parallel \frac{1}{N} \mathbb{1}) \leq \varepsilon} \sum_{i=1}^N q_i \left( \Psi(\lambda(w, \hat{x}_i)) - \langle T(\hat{y}_i), \lambda(w, \hat{x}_i) \rangle \right).$$

Therefore the objective functions are the same and the two problems are equivalent.  $\square$

The proof of Proposition 4.2 relies on the following result.

**Lemma C.1.** Let  $\Delta \subset \mathbb{R}^C$  be a simplex and  $\hat{p} \in \text{int}(\Delta)$  be a probability vector. For any two vectors  $\hat{t}, t^* \in \mathbb{R}^C$ , any vector  $\rho \in \mathbb{R}_+^C$  and any scalar  $\varepsilon \geq \hat{p}^\top \rho$ , we have

$$\begin{aligned} \sup \left\{ q^\top t^* - \hat{p}^\top \hat{t} : q \in \Delta, \sum_{c=1}^C q_c (\log q_c - \log \hat{p}_c + \rho_c) \leq \varepsilon \right\} \\ \leq \|t^* - \hat{t}\|_\infty + \frac{\sqrt{2\varepsilon}}{\min_c \sqrt{\hat{p}_c}} \sqrt{\sum_{c=1}^C \hat{p}_c (\hat{t}_c - \bar{t})^2}, \end{aligned}$$

where  $\bar{t} = \hat{p}^\top \hat{t}$ .

*Proof of Lemma C.1.* Let  $\mathbb{1}$  denote the  $C$  dimensional vector of 1's, we have

$$\begin{aligned} & \begin{cases} \sup & q^\top t^* - \hat{p}^\top \hat{t} \\ \text{s. t.} & q \in \Delta, \sum_{c=1}^C q_c (\log q_c - \log \hat{p}_c + \rho_c) \leq \varepsilon \end{cases} \\ &= \begin{cases} \sup & q^\top (t^* - \hat{t}) + (q - \hat{p})^\top \hat{t} \\ \text{s. t.} & q \in \Delta, \sum_{c=1}^C q_c (\log q_c - \log \hat{p}_c + \rho_c) \leq \varepsilon \end{cases} \\ &\leq \begin{cases} \sup & q^\top (t^* - \hat{t}) + (q - \hat{p})^\top \hat{t} \\ \text{s. t.} & q \in \Delta, \sum_{c=1}^C (q_c - \hat{p}_c)^2 \leq 2\varepsilon \end{cases} \\ &\leq \sup_{\|q\|_1=1} q^\top (t^* - \hat{t}) + \sup \{ (q - \hat{p})^\top (\hat{t} - \bar{t}\mathbb{1}) : \|q - \hat{p}\|_2^2 \leq 2\varepsilon \} \\ &\leq \sup_{\|q\|_1=1} q^\top (t^* - \hat{t}) + \sup \left\{ \sum_{c=1}^C \frac{q_c - \hat{p}_c}{\sqrt{\hat{p}_c}} \sqrt{\hat{p}_c} (\hat{t}_c - \bar{t}) : \|q - \hat{p}\|_2^2 \leq 2\varepsilon \right\} \\ &\leq \sup_{\|q\|_1=1} q^\top (t^* - \hat{t}) + \frac{\sqrt{2\varepsilon}}{\min_c \sqrt{\hat{p}_c}} \sqrt{\sum_{c=1}^C \hat{p}_c (\hat{t}_c - \bar{t})^2}, \end{aligned}$$

where the first inequality follows from Pinsker's inequality [8, Theorem 4.19] and the fact that  $\|q - \hat{p}\|_2^2 \leq \|q - \hat{p}\|_1^2 = 4\|q - \hat{p}\|_{TV}^2$ , the second inequality follows from the fact that  $(q - \hat{p})^\top \mathbb{1} = 0$  and dropping the constraint  $q \in \Delta$ , and the last inequality is from Cauchy-Schwarz.

In the last step, we have

$$\sup_{\|q\|_1=1} q^\top (t^* - \hat{t}) = \|t^* - \hat{t}\|_\infty,$$

which completes the proof.  $\square$

We now ready to prove Proposition 4.2.

*Proof of Proposition 4.2.* Let  $t^*$  and  $\hat{t}$  be two  $C$ -dimensional vectors whose elements are defined as

$$t_c^* = \sup_{Q_{Y|\hat{x}_c} \in \mathbb{B}_{Y|\hat{x}_c}} \mathbb{E}_{Q_{Y|\hat{x}_c}} [\ell_\lambda(\hat{x}_c, Y, w)], \quad \hat{t}_c = \mathbb{E}_{\hat{\mathbb{P}}_{Y|\hat{x}_c}} [\ell_\lambda(\hat{x}_c, Y, w)] \quad \forall c.$$

By Lemma C.1, we find

$$\begin{aligned} \sup_{Q \in \mathbb{B}(\hat{\mathbb{P}})} \mathbb{E}_Q[\ell_\lambda(X, Y, w)] - \mathbb{E}_{\hat{\mathbb{P}}}[\ell_\lambda(X, Y, w)] &= \begin{cases} \sup & q^\top t^* - \hat{p}^\top \hat{t} \\ \text{s. t.} & q \in \Delta, \sum_{c=1}^C q_c (\log q_c - \log \hat{p}_c + \rho_c) \leq \varepsilon \end{cases} \\ &\leq \|t^* - \hat{t}\|_\infty + \frac{\sqrt{2\varepsilon}}{\min_c \sqrt{\hat{p}_c}} \sqrt{\sum_{c=1}^C \hat{p}_c (\hat{t}_c - \bar{t})^2}, \end{aligned}$$



where  $\bar{t} = \hat{p}^\top \hat{t}$ . In the last step, notice that

$$\sum_{c=1}^C \hat{p}_c (\hat{t}_c - \bar{t})^2 = \text{Var}_{\hat{\mathbb{P}}_X} \left( \mathbb{E}_{\hat{\mathbb{P}}_{Y|X}} [\ell_\lambda(X, Y, w)] \right) \leq \text{Var}_{\hat{\mathbb{P}}} (\ell_\lambda(X, Y, w)).$$

It now remains to provide the bounds for  $\|t^* - \hat{t}\|_\infty$ . For any  $c$ , let  $\lambda_c = \lambda(w, \hat{x}_c)$ , we have

$$t_c^* - \hat{t}_c = \begin{cases} \sup & \langle \mu - \hat{\mu}_c, \lambda_c \rangle \\ \text{s. t.} & \phi(\mu) - \phi(\hat{\mu}_c) - \langle \mu - \hat{\mu}_c, \hat{\theta}_c \rangle \leq \rho_c. \end{cases}$$

Because  $\Psi$  has locally Lipschitz continuous gradients,  $\phi$  is locally strongly convex [9, Theorem 4.1]. Moreover, the feasible set  $\mathcal{S}_c$  of the above problem is compact by Lemma B.4, hence there exists a constant  $0 < m_c$  such that

$$\frac{m_c}{2} \|\mu - \hat{\mu}_c\|_2^2 \leq \phi(\mu) - \phi(\hat{\mu}_c) - \langle \mu - \hat{\mu}_c, \hat{\theta}_c \rangle \quad \forall \mu \in \mathcal{S}_c.$$

Notice that the constants  $m_c$  depends only on  $\Psi$  and  $\hat{\theta}_c$ . Thus, we find

$$t_c^* - \hat{t}_c \leq \sup \{ \langle \mu - \hat{\mu}_c, \lambda_c \rangle : m_c \|\mu - \hat{\mu}_c\|_2^2 \leq 2\rho_c \} = \sqrt{2\rho_c/m_c} \|\lambda(w, \hat{x}_c)\|_2.$$

By setting  $m = \min_c m_c$ , we have

$$\|t^* - \hat{t}\|_\infty \leq \sqrt{\frac{2 \max_c \rho_c}{m}} \|\lambda(w, \hat{x}_c)\|_2.$$

Combining terms leads to the postulated results.  $\square$

For any  $\hat{\theta}_c \in \Theta$ ,  $\rho_c \in \mathbb{R}_+$ , let  $\mathcal{R}_{\hat{\theta}_c, \rho_c}(w)$  denote the value of the worst-case expected log-loss

$$\mathcal{R}_{\hat{\theta}_c, \rho_c}(w) = \sup_{\mathbb{Q}_{Y|\hat{x}_c} \in \mathbb{B}_{Y|\hat{x}_c}} \mathbb{E}_{\mathbb{Q}_{Y|\hat{x}_c}} [\ell_\lambda(\hat{x}_c, Y, w)].$$

**Lemma C.2.** Suppose that the log-partition function  $\Psi$  has locally Lipschitz continuous gradients, that  $\Theta = \mathbb{R}^p$  and that  $\Theta_c \subset \Theta$  is a compact set. For any fixed  $\bar{\rho}_c \in \mathbb{R}_{++}$ , there exist constants  $0 < m < M < +\infty$  that depend only on  $\Psi$ ,  $\Theta_c$  and  $\bar{\rho}_c$  such that for any value  $\lambda(w, \hat{x}_c) \in \mathbb{R}^p$  and any radius  $\bar{\rho}_c \geq \rho_c \geq 0$

$$\sqrt{2\rho_c/M} \|\lambda(w, \hat{x}_c)\|_2 \leq \mathcal{R}_{\hat{\theta}_c, \rho_c}(w) - \mathcal{R}_{\hat{\theta}_c, 0}(w) \leq \sqrt{2\rho_c/m} \|\lambda(w, \hat{x}_c)\|_2 \quad \forall \hat{\theta}_c \in \Theta_c.$$

*Proof of Lemma C.2.* Consider the set

$$\mathcal{D} \triangleq \{ \hat{\mu}_c : \exists \hat{\theta}_c \in \Theta_c \text{ such that } \hat{\mu}_c = \nabla \Psi(\hat{\theta}_c) \}$$

and its  $\bar{\rho}_c$ -inflated set

$$\mathcal{D}_{\bar{\rho}_c} \triangleq \{ \mu : \exists \hat{\mu}_c \in \mathcal{D} \text{ such that } \phi(\mu) - \phi(\hat{\mu}_c) - \langle \mu - \hat{\mu}_c, \hat{\theta}_c \rangle \leq \bar{\rho}_c \}.$$

Because  $\Theta_c$  is compact and  $\nabla \Psi$  is a continuous function,  $\mathcal{D}$  is compact [1, Theorem 2.34]. Note that we can rewrite  $\mathcal{D}_{\bar{\rho}_c}$  as

$$\mathcal{D}_{\bar{\rho}_c} = \{ \mu : \exists \hat{\mu}_c \in \mathcal{D} \text{ such that } \phi(\mu) + \langle \mu, -\hat{\theta}_c \rangle \leq \bar{\rho}_c + \phi(\hat{\mu}_c) - \langle \hat{\mu}_c, \hat{\theta}_c \rangle \}.$$

Let  $S$  be temporarily the set

$$S = \left\{ \mu : \phi(\mu) + \inf_{\hat{\theta}_c \in \Theta_c} \langle \mu, -\hat{\theta}_c \rangle \leq \bar{\rho}_c + \sup_{\hat{\theta}_c \in \Theta_c} \phi(\hat{\mu}_c) - \langle \hat{\mu}_c, \hat{\theta}_c \rangle < \infty \right\}.$$

We have that  $\mathcal{D}_{\bar{\rho}_c} \subseteq S$ . Recall the definition of  $\phi$ :

$$\phi : \mu \mapsto \sup_{\theta \in \Theta} \{ \langle \mu, \theta \rangle - \Psi(\theta) \}.$$

Therefore  $\phi(\cdot)$  is closed, convex and proper. Therefore by [4, Proposition 2.16],  $\Theta = \mathbb{R}^p$  implies that  $\phi(\cdot)$  is super-coercive, i.e.,  $\lim_{\|\mu\|_2 \rightarrow \infty} \phi(\mu)/\|\mu\|_2 \rightarrow \infty$ . Thus

$$\lim_{\|\mu\|_2 \rightarrow \infty} \phi(\mu) + \inf_{\hat{\theta}_c \in \Theta_c} \langle \mu, -\hat{\theta}_c \rangle \rightarrow \infty.$$

Therefore  $S$  is bounded, which implies that  $\mathcal{D}_{\bar{\rho}_c}$  is also bounded.

Since  $\Theta_c$  is compact, there exists a subsequence  $\{\hat{\theta}_c^{k_n}\}_{n \geq 1}$  such that  $\hat{\theta}_c^{k_n} \rightarrow \hat{\theta}_c^\infty \in \Theta_c$  as  $n \rightarrow \infty$ . Since  $\mathcal{D}_{\rho_c}$  is bounded, it suffices to show that  $\mathcal{D}_{\rho_c}$  is closed. Choose any sequence  $\{\mu^k\}_{k \geq 1} \in \mathcal{D}_{\rho_c}$  such that  $\mu^k \rightarrow \mu^\infty$  as  $k \rightarrow \infty$ , we want to show that  $\mu^\infty \in \mathcal{D}_{\rho_c}$ . For each  $k$ , since  $\mu^k \in \mathcal{D}_{\rho_c}$ , there exists  $\hat{\mu}_c^k \in \mathcal{D}$  and  $\hat{\theta}_c^k \in \Theta_c$  such that  $\phi(\mu^k) - \phi(\hat{\mu}_c^k) - \langle \mu^k - \hat{\mu}_c^k, \hat{\theta}_c^k \rangle \leq \rho_c$ . Since  $\mathcal{D}$  and  $\Theta_c$  are compact, there exists a subsequence  $\{k_n\}_{n \geq 1}$  such that  $\hat{\mu}_c^{k_n} \rightarrow \hat{\mu}_c^\infty$  and  $\hat{\theta}_c^{k_n} \rightarrow \hat{\theta}_c^\infty$  for some  $\hat{\mu}_c^\infty \in \mathcal{D}$  and  $\hat{\theta}_c^\infty \in \Theta_c$ . Since  $\hat{\mu}_c^{k_n} = \nabla \Psi(\hat{\theta}_c^{k_n})$ , by continuity we have  $\hat{\mu}_c^\infty = \nabla \Psi(\hat{\theta}_c^\infty)$ . Note that

$$\phi(\mu^{k_n}) - \phi(\hat{\mu}_c^{k_n}) - \langle \mu^{k_n} - \hat{\mu}_c^{k_n}, \hat{\theta}_c^{k_n} \rangle \leq \rho_c,$$

by continuity of  $\phi$ , we have

$$\phi(\mu^\infty) - \phi(\hat{\mu}_c^\infty) - \langle \mu^\infty - \hat{\mu}_c^\infty, \hat{\theta}_c^\infty \rangle \leq \rho_c.$$

Therefore  $\mu^\infty \in \mathcal{D}_{\rho_c}$  and hence  $\mathcal{D}_{\rho_c}$  is closed.

The finite dimensional set  $\mathcal{D}_{\bar{\rho}_c}$  is closed and bounded, thus it is compact, and moreover  $\mathcal{D} \subseteq \mathcal{D}_{\rho_c}$ . The convex hull  $\bar{\mathcal{D}}_{\bar{\rho}_c}$  of  $\mathcal{D}_{\bar{\rho}_c}$  is also compact [1, Corollary 5.33]. Because  $\Psi$  has locally Lipschitz continuous gradients,  $\phi$  is locally strongly convex [9, Theorem 4.1]. Moreover,  $\phi$  is also essentially smooth by Lemma B.2(v). Thus over the set  $\bar{\mathcal{D}}_{\bar{\rho}_c}$ , there exist constants  $0 < m \leq M < +\infty$  such that

$$\frac{m}{2} \|\mu - \mu'\|_2^2 \leq \phi(\mu) - \phi(\mu') - \langle \mu - \mu', \theta' \rangle \leq \frac{M}{2} \|\mu - \mu'\|_2^2 \quad \forall \mu, \mu' \in \bar{\mathcal{D}}_{\bar{\rho}_c}, \mu' = \nabla \Psi(\theta').$$

Notice that the constants  $m$  and  $M$  depend only on  $\phi$ , and thus on  $\Psi$ ,  $\bar{\rho}_c$  and  $\Theta_c$ .

Denote temporarily the shorthand  $\lambda_c = \lambda(w, \hat{x}_c)$ . We have  $\mathcal{R}_{\hat{\theta}_c, 0}(w) = \Psi(\lambda_c) - \langle \hat{\mu}_c, \lambda_c \rangle$ , and so

$$\mathcal{R}_{\hat{\theta}_c, \rho_c}(w) - \mathcal{R}_{\hat{\theta}_c, 0}(w) = \begin{cases} \sup & \langle \mu - \hat{\mu}_c, \lambda_c \rangle \\ \text{s. t.} & \phi(\mu) - \phi(\hat{\mu}_c) - \langle \mu - \hat{\mu}_c, \hat{\theta}_c \rangle \leq \rho_c. \end{cases}$$

Because  $\mu$  and  $\hat{\mu}_c$  are both in  $\bar{\mathcal{D}}_{\bar{\rho}_c}$ , we have

$$\frac{m}{2} \|\mu - \hat{\mu}_c\|_2^2 \leq \phi(\mu) - \phi(\hat{\mu}_c) - \langle \mu - \hat{\mu}_c, \hat{\theta}_c \rangle \leq \frac{M}{2} \|\mu - \hat{\mu}_c\|_2^2.$$

We now have

$$\mathcal{R}_{\hat{\theta}_c, \rho_c}(w) - \mathcal{R}_{\hat{\theta}_c, 0}(w) \leq \sup \{ \langle \mu - \hat{\mu}_c, \lambda_c \rangle : \|\mu - \hat{\mu}_c\|_2^2 \leq 2\rho_c/m \} = \sqrt{2\rho_c/m} \|\lambda_c\|_2.$$

A similar argument leads to the lower bound. This observation completes the proof.  $\square$

*Proof of Theorem 4.3.* Without loss of generality consider  $\mathcal{W} \subseteq \mathbb{R}^q$ . For notational simplicity, denote

$$R_{\hat{\theta}, \varepsilon, \rho}(w) = \sup_{\mathbb{Q} \in \mathbb{B}(\mathbb{P})} \mathbb{E}_{\mathbb{Q}} [\ell_\lambda(X, Y, w)].$$

Since  $\varepsilon \geq \sum_{c=1}^C \hat{p}_c \rho_c$  with probability going to 1, following the same argument as in the proof of Proposition 4.2, we have that with probability going to 1, for any  $w \in \mathcal{W}$ ,

$$R_{\hat{\theta}, \varepsilon, \rho}(w) - R_{\hat{\theta}, 0, 0}(w) \leq \|t^* - \hat{t}\|_1 + \sqrt{2\varepsilon} \|\hat{t}\|_1,$$

where

$$\|\hat{t}\|_1 = \sum_{c=1}^C |\mathbb{E}_{\hat{\mathbb{P}}_{Y|\hat{x}_c}} [\ell_\lambda(\hat{x}_c, Y, w)]| \quad \text{and} \quad \|t^* - \hat{t}\|_1 = \sum_{c=1}^C |\mathcal{R}_{\hat{\theta}_c, \rho_c}(w) - \mathcal{R}_{\hat{\theta}_c, 0}(w)|.$$

For each  $w$ , since  $\hat{\theta}_c \rightarrow \lambda(w_0, \hat{x}_c)$  in probability, we have  $\mathbb{P}(\|\hat{\theta}_c - \lambda(w_0, \hat{x}_c)\|_2 > 1) \rightarrow 0$ . Therefore there exists compact set  $\Theta_c$  for each  $c$  such that  $\hat{\theta}_c$  is contained in  $\Theta_c$  with probability going to 1. Choose  $\bar{\rho}_c = 1$ , since  $\rho_c \rightarrow 0$ , we have  $\bar{\rho}_c \geq \rho_c$  eventually. Therefore, by Lemma C.2, for each  $c$  with probability going to 1

$$|\mathcal{R}_{\hat{\theta}_c, \rho_c}(w) - \mathcal{R}_{\hat{\theta}_c, 0}(w)| \leq \sqrt{2\rho_c/m} \|\lambda(w, \hat{x}_c)\|_2,$$

where the above constant  $m$  can be chosen independent of  $c$  due to the finite cardinality assumption of  $\mathcal{X}$ . Since the function  $\lambda(w, \hat{x}_c)$  is continuous in  $w$  for any  $\hat{x}_c$ , we have  $\|\lambda(w, \hat{x}_c)\|_2$  is bounded for all  $w$  ranging over a compact set  $W \subset \mathcal{W}$ . Thus for each  $c$  with probability going to 1, we have

$$\sup_{w \in W} |\mathcal{R}_{\hat{\theta}_c, \rho_c}(w) - \mathcal{R}_{\hat{\theta}_c, 0}(w)| \leq \sqrt{2\rho_c/m} \sup_{w \in W} \|\lambda(w, \hat{x}_c)\|_2.$$

Since  $\rho_c \rightarrow 0$ , we have for each  $c$

$$\sup_{w \in W} |\mathcal{R}_{\hat{\theta}_c, \rho_c}(w) - \mathcal{R}_{\hat{\theta}_c, 0}(w)| = o_{\mathbb{P}}(1).$$

Thus  $\sup_{w \in W} \|t^* - \hat{t}\|_1 = o_{\mathbb{P}}(1)$ . On the other hand, since  $\sup_{w \in W} \mathcal{R}_{\hat{\theta}_c, 0}(w)$  is  $O_{\mathbb{P}}(1)$ , we have  $\sup_{w \in W} \|\hat{t}\|_1 = O_{\mathbb{P}}(1)$ . Therefore as  $\varepsilon \rightarrow 0, \rho_c \rightarrow 0$ ,

$$\sup_{w \in W} |R_{\hat{\theta}, \varepsilon, \rho}(w) - R_{\hat{\theta}, 0, 0}(w)| = o_{\mathbb{P}}(1)$$

for any compact set  $W$ . Next, since  $\hat{\theta}_c \rightarrow \lambda(w_0, \hat{x}_c)$  in probability, we have by continuous mapping theorem

$$\nabla \Psi(\hat{\theta}_c) \rightarrow \nabla \Psi(\lambda(w_0, \hat{x}_c)) \text{ in probability.}$$

Besides, by the strong law of large number,

$$\hat{p}_c \rightarrow \mathbb{P}(X = \hat{x}_c) \text{ almost surely.}$$

Recall that

$$\begin{aligned} R_{\hat{\theta}, 0, 0}(w) &= \mathbb{E}_{\mathbb{P}}[\ell_{\lambda}(X, Y, w)] = \sum_{c=1}^C \hat{p}_c \mathbb{E}_{\mathbb{P}_{Y|\hat{x}_c}}[\ell_{\lambda}(\hat{x}_c, Y, w)] \\ &= \sum_{c=1}^C \hat{p}_c \left( \Psi(\lambda(w, \hat{x}_c)) - \langle \nabla \Psi(\hat{\theta}_c), \lambda(w, \hat{x}_c) \rangle \right). \end{aligned}$$

Therefore, for each  $w$ , we have

$$R_{\hat{\theta}, 0, 0}(w) \rightarrow R(w) \text{ in probability,}$$

where

$$R(w) = \mathbb{E}_{\mathbb{P}}[\ell_{\lambda}(X, Y, w)] = \sum_{c=1}^C \mathbb{P}(X = \hat{x}_c) \left( \Psi(\lambda(w, \hat{x}_c)) - \langle \nabla \Psi(\lambda(w_0, \hat{x}_c)), \lambda(w, \hat{x}_c) \rangle \right).$$

Since for each  $c$ ,

$$w_0 = \min_{w \in \mathcal{W}} \Psi(\lambda(w, \hat{x}_c)) - \langle \nabla \Psi(\lambda(w_0, \hat{x}_c)), \lambda(w, \hat{x}_c) \rangle$$

Therefore  $w_0$  solves  $\min_{w \in \mathcal{W}} R(w)$ . If  $R(w)$  admits an unique solution, then clearly  $w_0$  is such a solution. Since  $R_{\hat{\theta}, 0, 0}(\cdot)$  is convex, by [2, Theorem II.1],

$$\sup_{w \in W} |R_{\hat{\theta}, 0, 0}(w) - R(w)| = o_{\mathbb{P}}(1)$$

for any compact set  $W$ . Thus by triangle inequality

$$\sup_{w \in W} |R_{\hat{\theta}, \varepsilon, \rho}(w) - R(w)| = o_{\mathbb{P}}(1)$$

for any compact set  $W$ . Let  $B$  denote the unit closed ball in  $\mathbb{R}^q$ , then  $w_0 + \eta B$  is compact for any  $\eta > 0$ . Thus  $R_{\hat{\theta}, \varepsilon, \rho}(w) - R(w) = o_{\mathbb{P}}(1)$  uniformly over  $w_0 + \eta B$ . Since  $R(w)$  is convex and  $w_0$  is its unique optimal solution, we have

$$\inf_{w \in w_0 + \eta B \setminus \frac{\eta}{2} B} R(w) > R(w_0).$$

Therefore, with probability going to 1,

$$\inf_{w \in w_0 + \frac{\eta}{2} B} R_{\hat{\theta}, \varepsilon, \rho}(w) < \inf_{w \in w_0 + \eta B \setminus \frac{\eta}{2} B} R_{\hat{\theta}, \varepsilon, \rho}(w).$$

Thus by convexity of  $R_{\hat{\theta}, \varepsilon, \rho}$ , also

$$\inf_{w \in w_0 + \frac{\eta}{2}B} R_{\hat{\theta}, \varepsilon, \rho}(w) < \inf_{w \notin w_0 + \eta B} R_{\hat{\theta}, \varepsilon, \rho}(w).$$

Thus the solution  $w^*$  that solves  $\inf_{w \in \mathcal{W}} R_{\hat{\theta}, \varepsilon, \rho}(w)$  satisfies

$$\mathbb{P}(\|w^* - w_0\|_2 \leq \frac{\eta}{2}) \rightarrow 1.$$

Since  $\eta$  is chosen arbitrarily, we conclude that  $w^* \rightarrow w_0$  in probability.  $\square$

*Proof of Lemma 4.4.* Denote

$$W_c = \sqrt{N_c} \left( \frac{\sum_{\hat{x}_i = \hat{x}_c} T(\hat{y}_i)}{N_c} - \mathbb{E}_{f(\cdot | \theta_c)}[T(Y)] \right).$$

W.l.o.g. we can assume that  $\mathbb{E}_{f(\cdot | \theta_c)}[T(Y)] = 0$ . We first show the joint convergence

$$(W_1^\top, \dots, W_C^\top)^\top \xrightarrow{d} \mathcal{N}(0, G) \quad \text{as } N \rightarrow \infty,$$

where  $G$  is a block-diagonal matrix with diagonal blocks given by  $G_c = \text{Cov}_{f(\cdot | \theta_c)}(T(Y))$ ,  $c = 1, \dots, C$ . Note that

$$N_c/N \rightarrow \mathbb{P}(X = \hat{x}_c) > 0 \quad \text{a.s. for each } c.$$

For convenience denote  $r_c = \mathbb{P}(X = \hat{x}_c)$ . We let

$$\tilde{W}_c = \sqrt{\lfloor r_c N \rfloor} \cdot \frac{\sum_{\hat{x}_i = \hat{x}_c} T(\hat{y}_i)}{\lfloor r_c N \rfloor} = \frac{\sum_{\hat{x}_i = \hat{x}_c} T(\hat{y}_i)}{\sqrt{\lfloor r_c N \rfloor}}.$$

Let  $[\sum_{\hat{x}_i = \hat{x}_c} T(\hat{y}_i)]_{\lfloor r_c N \rfloor}$  be the sum of the first  $\lfloor r_c N \rfloor$  samples of  $T(\hat{y}_i)$  such that  $\hat{x}_i = \hat{x}_c$ . If  $N_c < \lfloor r_c N \rfloor$ , we add additional  $\lfloor r_c N \rfloor - N_c$  independent copies of  $T(Y)$  where  $Y \sim f(\cdot | \theta_c)$  to the sum  $\sum_{\hat{x}_i = \hat{x}_c} T(\hat{y}_i)$ , and denote it by  $[\sum_{\hat{x}_i = \hat{x}_c} T(\hat{y}_i)]_{\lfloor r_c N \rfloor}$  as well. Denote

$$\bar{W}_c = \frac{[\sum_{\hat{x}_i = \hat{x}_c} T(\hat{y}_i)]_{\lfloor r_c N \rfloor}}{\sqrt{\lfloor r_c N \rfloor}}.$$

Note that  $\bar{W}_1, \dots, \bar{W}_C$  are independent, by i.i.d. central limit theorem

$$(\bar{W}_1^\top, \dots, \bar{W}_C^\top)^\top \xrightarrow{d} \mathcal{N}(0, G) \quad \text{as } N \rightarrow \infty,$$

where  $G$  is a block-diagonal matrix with  $G_c = \text{Cov}_{f(\cdot | \theta_c)}(T(Y))$ . We next show that

$$\tilde{W}_c - \bar{W}_c = o_{\mathbb{P}}(1).$$

Note that

$$\tilde{W}_c - \bar{W}_c = \frac{[\sum_{\hat{x}_i = \hat{x}_c} T(\hat{y}_i)]_{\lfloor r_c N \rfloor} - \sum_{\hat{x}_i = \hat{x}_c} T(\hat{y}_i)}{\sqrt{\lfloor r_c N \rfloor}}.$$

By Chebyshev inequality

$$\begin{aligned} \mathbb{P}(\|\tilde{W}_c - \bar{W}_c\|_2 > \epsilon) &\leq \frac{\mathbb{E} \left[ \left\| [\sum_{\hat{x}_i = \hat{x}_c} T(\hat{y}_i)]_{\lfloor r_c N \rfloor} - \sum_{\hat{x}_i = \hat{x}_c} T(\hat{y}_i) \right\|_2^2 \right]}{\epsilon^2 \lfloor r_c N \rfloor} \\ &= \frac{\mathbb{E} \left[ \mathbb{E} \left[ \left\| [\sum_{\hat{x}_i = \hat{x}_c} T(\hat{y}_i)]_{\lfloor r_c N \rfloor} - \sum_{\hat{x}_i = \hat{x}_c} T(\hat{y}_i) \right\|_2^2 \middle| N_c \right] \right]}{\epsilon^2 \lfloor r_c N \rfloor} \\ &= \frac{\mathbb{E}[\|T(\hat{y}_i)\|_2^2] \mathbb{E}[\lfloor r_c N \rfloor - N_c]}{\epsilon^2 \lfloor r_c N \rfloor}. \end{aligned}$$

Since  $N_c/\lfloor r_c N \rfloor \rightarrow 1$  almost surely, by dominated convergence theorem

$$\frac{\mathbb{E}[\lfloor r_c N \rfloor - N_c]}{\lfloor r_c N \rfloor} \rightarrow 0.$$

Thus

$$\mathbb{P}(\|\tilde{W}_c - \bar{W}_c\|_2 > \epsilon) \rightarrow 0 \quad \text{as} \quad N \rightarrow \infty,$$

which means that  $\tilde{W}_c - \bar{W}_c = o_{\mathbb{P}}(1)$ . Thus by Slutsky's lemma

$$\left(\tilde{W}_1^\top, \dots, \tilde{W}_C^\top\right)^\top \xrightarrow{d} \mathcal{N}(0, G) \quad \text{as} \quad N \rightarrow \infty.$$

Finally, since  $W_c = (1 + o_{\mathbb{P}}(1))\tilde{W}_c$ , by Slutsky's lemma,

$$\left(W_1^\top, \dots, W_C^\top\right)^\top \xrightarrow{d} \mathcal{N}(0, G) \quad \text{as} \quad N \rightarrow \infty.$$

Now note that

$$\hat{\theta}_c = (\nabla \Psi)^{-1} \left( (N_c)^{-1} \sum_{\hat{x}_i = \hat{x}_c} T(\hat{y}_i) \right)$$

and

$$\theta_c = (\nabla \Psi)^{-1} (\mathbb{E}_{f(\cdot | \theta_c)}[T(Y)]).$$

Also note that the vector-valued function  $(\nabla \Psi)^{-1}(\cdot)$  is continuously differentiable at  $\mathbb{E}_{f(\cdot | \theta_c)}[T(Y)]$ , therefore, by the delta method

$$\left(\sqrt{N_1}(\hat{\theta}_1 - \theta_1)^\top, \dots, \sqrt{N_C}(\hat{\theta}_C - \theta_C)^\top\right)^\top \xrightarrow{d} D \cdot \mathcal{N}(0, G),$$

where  $D$  is a block-diagonal matrix with diagonal elements given by

$$D_c = J(\nabla \Psi)^{-1}(\mathbb{E}_{f(\cdot | \theta_c)}[T(Y)])$$

the Jacobian matrix of  $(\nabla \Psi)^{-1}$  evaluated at  $\mathbb{E}_{f(\cdot | \theta_c)}[T(Y)]$ . Thus

$$V_c = D_c \text{Cov}_{f(\cdot | \theta_c)}(T(Y)) D_c^\top.$$

Note that by Lemma B.3, we find

$$\text{KL}(f(\cdot | \theta_c) \parallel f(\cdot | \hat{\theta}_c)) = \langle \theta_c - \hat{\theta}_c, \mu_c \rangle + \Psi(\hat{\theta}_c) - \Psi(\theta_c).$$

Note that  $\Psi$  is infinitely-many differentiable, we have the follow Taylor expansion

$$\Psi(\hat{\theta}_c) - \Psi(\theta_c) = \langle \hat{\theta}_c - \theta_c, \mu_c \rangle + \frac{1}{2} \langle \hat{\theta}_c - \theta_c, \nabla^2 \Psi(\theta_c + \eta(\hat{\theta}_c - \theta_c))(\hat{\theta}_c - \theta_c) \rangle,$$

where  $\eta$  is a random variable with values between 0 and 1. Therefore

$$\text{KL}(f(\cdot | \theta_c) \parallel f(\cdot | \hat{\theta}_c)) = \frac{1}{2} \langle \hat{\theta}_c - \theta_c, \nabla^2 \Psi(\theta_c + \eta(\hat{\theta}_c - \theta_c))(\hat{\theta}_c - \theta_c) \rangle.$$

Because  $\sqrt{N_c}(\hat{\theta}_c - \theta_c) \xrightarrow{d} \mathcal{N}(0, V_c)$ , and  $\nabla^2 \Psi(\cdot)$  is continuous, we have

$$\nabla^2 \Psi(\theta_c + \eta(\hat{\theta}_c - \theta_c)) = \nabla^2 \Psi(\theta_c) + o_{\mathbb{P}}(1).$$

Moreover, since we have the joint convergence

$$\left(\sqrt{N_1}(\hat{\theta}_1 - \theta_1)^\top, \dots, \sqrt{N_C}(\hat{\theta}_C - \theta_C)^\top\right)^\top \xrightarrow{d} \mathcal{N}(0, V),$$

by continuous mapping theorem

$$\left(N_1 \times \text{KL}(f(\cdot | \theta_1) \parallel f(\cdot | \hat{\theta}_1)), \dots, N_C \times \text{KL}(f(\cdot | \theta_C) \parallel f(\cdot | \hat{\theta}_C))\right)^\top \xrightarrow{d} Z \quad \text{as} \quad N \rightarrow \infty,$$

where  $Z = (Z_1, \dots, Z_C)^\top$  with  $Z_c = \frac{1}{2} R_c^\top \nabla^2 \Psi(\theta_c) R_c$ ,  $R_c \sim \mathcal{N}(0, V_c)$  and are independent for  $c = 1, \dots, C$ .  $\square$

Before proving the result on the worst-case distribution in Theorem 4.5, we first prove the worst-case conditional measure that maximize problem (9).

**Proposition C.3** (Worst-case conditional distribution). For any  $w \in \mathcal{W}$  and  $\rho_c \in \mathbb{R}_{++}$ , then the supremum problem (9) is attained by  $\mathbb{Q}_{Y|\hat{x}_c}^* \sim f(\cdot | \theta_c^*)$  with  $\theta_c^* = \hat{\theta}_c - \lambda(w, \hat{x}_c)/\gamma_c^*$ , where  $\gamma_c^* > 0$  is the solution of the nonlinear algebraic equation

$$\Psi(\hat{\theta}_c - \gamma^{-1}\lambda(w, \hat{x}_c)) + \gamma^{-1}\langle \nabla \Psi(\hat{\theta}_c - \gamma^{-1}\lambda(w, \hat{x}_c)), \lambda(w, \hat{x}_c) \rangle = \Psi(\hat{\theta}_c) - \rho_c. \quad (\text{A.9})$$

*Proof of Proposition C.3.* Reminding that problem (9) is written as

$$\sup_{\mathbb{Q}_{Y|\hat{x}_c} \in \mathbb{B}_{Y|\hat{x}_c}} \mathbb{E}_{\mathbb{Q}_{Y|\hat{x}_c}} [\ell_\lambda(\hat{x}_c, Y, w)].$$

In the first step, we show that  $\mathbb{Q}_{Y|\hat{x}_c}^*$  is feasible in problem (9), which means that  $\mathbb{Q}_{Y|\hat{x}_c}^* \in \mathbb{B}_{Y|\hat{x}_c}$ . Indeed, we find that

$$\text{KL}(\mathbb{Q}_{Y|\hat{x}_c}^* \parallel \hat{\mathbb{P}}_{Y|\hat{x}_c}) = -\Psi\left(\hat{\theta}_c - \frac{\lambda(w, \hat{x}_c)}{\gamma_c^*}\right) - \frac{1}{\gamma_c^*} \langle \nabla \Psi\left(\hat{\theta}_c - \frac{\lambda(w, \hat{x}_c)}{\gamma_c^*}\right), \lambda(w, \hat{x}_c) \rangle + \Psi(\hat{\theta}_c) = \rho_c,$$

where the first equality exploits the expression of the KL divergence between two distributions from the same family in Lemma B.3, and the second equality follows from the fact that  $\gamma_c^*$  solves (A.9).

Proposition 3.2 asserts that the worst-case conditional expected log-loss problem (9) is equivalent to the convex program (10). Noticing that (A.9) is the first-order optimality condition of problem (10), thus, by definition,  $\gamma_c^*$  is the minimizer of (10). The objective value of  $\mathbb{Q}_{Y|\hat{x}_c}^*$  in (9) amounts to

$$\begin{aligned} \mathbb{E}_{\mathbb{Q}_{Y|\hat{x}_c}^*} [\ell_\lambda(\hat{x}_c, Y, w)] &= \Psi(\lambda(w, \hat{x}_c)) - \langle \mathbb{E}_{\mathbb{Q}_{Y|\hat{x}_c}^*} [T(Y)], \lambda(w, \hat{x}_c) \rangle \\ &= \Psi(\lambda(w, \hat{x}_c)) - \langle \nabla \Psi\left(\hat{\theta}_c - \frac{\lambda(w, \hat{x}_c)}{\gamma_c^*}\right), \lambda(w, \hat{x}_c) \rangle \\ &= \gamma_c^* (\rho_c - \Psi(\hat{\theta}_c)) + \gamma_c^* \Psi\left(\hat{\theta}_c - \frac{\lambda(w, \hat{x}_c)}{\gamma_c^*}\right) + \Psi(\lambda(w, \hat{x}_c)), \end{aligned}$$

where the first equality follows by substituting the expression of  $\ell_\lambda$  and the linearity of the expectation operator, the second equality follows from the convex conjugate relationship between the expectation parameters and the log-partition function  $\Psi$ , and the last equality follows from the fact that  $\gamma_c^*$  solves (A.9). Notice that the last expression coincide with the objective value of (10) evaluated at the optimal solution  $\gamma_c^*$ . This observation implies that  $\mathbb{Q}_{Y|\hat{x}_c}^*$  attains the optimal value in (9).  $\square$

Next, we establish the following result on the optimal solution of the support function  $h_{\mathcal{Q}}$  of the set  $\mathcal{Q}$  defined as in Lemma B.1.

**Lemma C.4** (Support point of  $\mathcal{Q}$ ). Let  $\mathcal{Q}$  be defined as in (A.1). For any  $t \in \mathbb{R}^C$ , if there exist  $\alpha^* \in \mathbb{R}$  and  $\beta^* \in \mathbb{R}_{++}$  that solve the following system of nonlinear algebraic equation

$$\sum_{c=1}^C \hat{p}_c \exp\left(\frac{t_c - \alpha}{\beta} - \rho_c - 1\right) - 1 = 0 \quad (\text{A.10a})$$

$$\sum_{c=1}^C \hat{p}_c (t_c - \alpha) \exp\left(\frac{t_c - \alpha}{\beta} - \rho_c - 1\right) - (\varepsilon + 1)\beta = 0 \quad (\text{A.10b})$$

then the optimal solution  $q^* \in \mathcal{Q}$  that attains  $t^\top q^* = h_{\mathcal{Q}}(t)$  is

$$q_c^* = \hat{p}_c \exp\left(\frac{t_c - \alpha^*}{\beta^*} - \rho_c - 1\right) \quad \forall c = 1, \dots, C. \quad (\text{A.10c})$$

*Proof of Lemma C.4.* By definition of  $q^*$  in (A.10c), one can verify that  $q^* \geq 0$  and that  $\sum_{c=1}^C q_c^* = 1$ , where the equality follows from (A.10a). Moreover,

$$\begin{aligned} \sum_{c=1}^C q_c^* (\log q_c^* - \log \hat{p}_c + \rho_c) &= \sum_{c=1}^C \hat{p}_c \left(\frac{t_c - \alpha^*}{\beta^*} - 1\right) \exp\left(\frac{t_c - \alpha^*}{\beta^*} - \rho_c - 1\right) \\ &= \sum_{c=1}^C \hat{p}_c \left(\frac{t_c - \alpha^*}{\beta^*}\right) \exp\left(\frac{t_c - \alpha^*}{\beta^*} - \rho_c - 1\right) - 1 = \varepsilon, \end{aligned}$$

where the equalities follow from the definition of  $q^*$  in (A.10c), and the equations (A.10a) and (A.10b), respectively. This implies that  $q^* \in \mathcal{Q}$ .

It now remains to show that  $t^\top q^* = h_{\mathcal{Q}}(t)$ . By Lemma B.1, we have

$$h_{\mathcal{Q}}(t) = \begin{cases} \inf & \alpha + \varepsilon\beta + \beta \sum_{c=1}^C \hat{p}_c \exp\left(\frac{t_c - \alpha}{\beta} - \rho_c - 1\right) \\ \text{s. t.} & \alpha \in \mathbb{R}, \beta \in \mathbb{R}_{++}. \end{cases}$$

If  $(\alpha^*, \beta^*) \in \mathbb{R} \times \mathbb{R}_{++}$  is the solution of (A.10a)-(A.10b), then  $(\alpha^*, \beta^*)$  satisfy the Karush-Kuhn-Tucker condition of the above infimum optimization problem, and thus we have

$$h_{\mathcal{Q}}(t) = \alpha^* + \varepsilon\beta^* + \beta^* \sum_{c=1}^C \hat{p}_c \exp\left(\frac{t_c - \alpha^*}{\beta^*} - \rho_c - 1\right).$$

Moreover, we find

$$\begin{aligned} \sum_{c=1}^C t_c q_c^* &= \sum_{c=1}^C t_c \hat{p}_c \exp\left(\frac{t_c - \alpha^*}{\beta^*} - \rho_c - 1\right) \\ &= (\varepsilon + 1)\beta^* + \alpha^* \sum_{c=1}^C \hat{p}_c \exp\left(\frac{t_c - \alpha^*}{\beta^*} - \rho_c - 1\right) \\ &= \alpha^* + \varepsilon\beta^* + \beta^* \sum_{c=1}^C \hat{p}_c \exp\left(\frac{t_c - \alpha^*}{\beta^*} - \rho_c - 1\right) = h_{\mathcal{Q}}(t), \end{aligned}$$

where the first equality follows from the definition of  $q^*$ , the second equality follows from (A.10b) and the third equality follows from (A.10a). This observation completes the proof.  $\square$

*Proof of Theorem 4.5.* It is easy to verify that  $\mathbb{Q}^*$  is a probability measure because each  $\delta_{\hat{x}_c}$  and  $\mathbb{Q}_{Y|\hat{x}_c}^*$  is a probability measure, and  $\sum_{c=1}^C \hat{p}_c \exp((t_c^* - \alpha^*)/\beta^* - \rho_c - 1) = 1$  since  $\alpha^*, \beta^*$  solves

$$\sum_{c=1}^C \hat{p}_c \exp(\beta^{-1}(t_c^* - \alpha) - \rho_c - 1) - 1 = 0 \quad (\text{A.11})$$

$$\sum_{c=1}^C \hat{p}_c (t_c^* - \alpha) \exp(\beta^{-1}(t_c^* - \alpha) - \rho_c - 1) - (\varepsilon + 1)\beta = 0, \quad (\text{A.12})$$

If we set  $\mathbb{Q}_X^* = \sum_{c=1}^C \hat{p}_c \exp((t_c^* - \alpha^*)/\beta^* - \rho_c - 1) \delta_{\hat{x}_c}$ , then we have

$$\mathbb{Q}^*(\{\hat{x}_c\} \times A) = \mathbb{Q}_X^*(\{\hat{x}_c\}) \mathbb{Q}_{Y|\hat{x}_c}^*(A) \quad \forall A \in \mathcal{F}(\mathcal{Y}), \forall c.$$

Moreover, because  $\mathbb{Q}_{Y|\hat{x}_c}^*$  is constructed using Proposition C.3, we have  $\text{KL}(\mathbb{Q}_{Y|\hat{x}_c} \parallel \hat{\mathbb{P}}_{Y|\hat{x}_c}) \leq \rho_c$  for all  $c$ . Furthermore, we also have

$$\begin{aligned} \text{KL}(\mathbb{Q}_X^* \parallel \hat{\mathbb{P}}_X) + \mathbb{E}_{\mathbb{Q}_X^*} \left[ \sum_{c=1}^C \rho_c \mathbb{1}_{\hat{x}_c}(X) \right] &= \sum_{c=1}^C \hat{p}_c \left( \frac{t_c^* - \alpha^*}{\beta^*} - 1 \right) \exp\left(\frac{t_c^* - \alpha^*}{\beta^*} - \rho_c - 1\right) \\ &= \sum_{c=1}^C \hat{p}_c \left( \frac{t_c^* - \alpha^*}{\beta^*} \right) \exp\left(\frac{t_c^* - \alpha^*}{\beta^*} - \rho_c - 1\right) - 1 = \varepsilon, \end{aligned}$$

where the equalities follow from the construction of  $\mathbb{Q}_X^*$  and the equations (A.11) and (A.12), respectively. This implies that  $\mathbb{Q}^* \in \mathbb{B}(\hat{\mathbb{P}})$ .

It now remains to show that  $\mathbb{Q}^*$  is optimal. For any weight  $w$ , by the definition of  $t_c^*$ , we have

$$t_c^* = \mathbb{E}_{\mathbb{Q}_{Y|\hat{x}_c}^*} [\ell_\lambda(\hat{x}_c, Y, w)] = \sup_{\mathbb{Q}_{Y|\hat{x}_c} \in \mathbb{B}_{Y|\hat{x}_c}} \mathbb{E}_{\mathbb{Q}_{Y|\hat{x}_c}} [\ell_\lambda(\hat{x}_c, Y, w)]$$

We thus find

$$\begin{aligned}
\max_{\mathbb{Q} \in \mathbb{B}(\mathbb{P})} \mathbb{E}_{\mathbb{Q}} [\ell_{\lambda}(X, Y, w)] &= \sup_{\mathbb{Q}_X \in \mathbb{B}_X} \mathbb{E}_{\mathbb{Q}_X} \left[ \sup_{\mathbb{Q}_{Y|X} \in \mathbb{B}_{Y|X}} \mathbb{E}_{\mathbb{Q}_{Y|X}} [\ell_{\lambda}(X, Y, w)] \right] \\
&= \sup_{\mathbb{Q}_X \in \mathbb{B}_X} \mathbb{E}_{\mathbb{Q}_X} \left[ \sum_{c=1}^C t_c^* \mathbb{1}_{\hat{x}_c}(X) \right] \\
&= \sup_{q \in \mathcal{Q}} q^{\top} t^* \tag{A.13}
\end{aligned}$$

$$= \sum_{c=1}^C \hat{p}_c t_c^* \exp \left( \frac{t_c^* - \alpha^*}{\beta^*} - \rho_c - 1 \right) \tag{A.14}$$

$$\begin{aligned}
&= \mathbb{E}_{\mathbb{Q}_X^*} \left[ \sum_{c=1}^C t_c^* \mathbb{1}_{\hat{x}_c}(X) \right] \tag{A.15} \\
&= \mathbb{E}_{\mathbb{Q}_X^*} [\mathbb{E}_{\mathbb{Q}_{Y|X}^*} [\ell_{\lambda}(X, Y, w)]] = \mathbb{E}_{\mathbb{Q}^*} [\ell_{\lambda}(X, Y, w)].
\end{aligned}$$

where the set  $\mathcal{Q}$  in (A.13) is defined as in (A.1). Equality (A.14) follows from Lemma C.4 and from the definition of  $\alpha^*$  and  $\beta^*$  that solve (A.11)-(A.12). Equality (A.15) follows from the definition of  $\mathbb{Q}_X^*$ . The proof is completed.  $\square$

## D Auxiliary Results

**Lemma D.1** (Locally strongly convex parameter). If  $\Psi$  is locally strongly smooth, and at  $\hat{\theta}$ , the smoothness parameter is  $\sigma$ , then  $\phi$  is locally strongly convex at  $\hat{\mu} = \nabla \Psi(\hat{\theta})$  with strongly convex parameter  $1/\sigma$  in a sufficiently small neighbourhood of  $\hat{\mu}$ .

*Proof of Lemma D.1.* The proof follows directly from the proof of [9, Theorem 4.1]. By the definition of locally strongly smooth, for some  $\Theta' \subseteq \Theta$  neighborhood of  $\hat{\theta}$ , we have for  $\theta \in \Theta'$

$$\Psi(\theta) \leq \Psi(\hat{\theta}) + \langle \nabla \Psi(\hat{\theta}), \theta - \hat{\theta} \rangle + \frac{\sigma}{2} \|\theta - \hat{\theta}\|_2^2.$$

Since  $\hat{\mu} = \nabla \Psi(\hat{\theta})$  and  $\phi(\hat{\mu}) = \langle \hat{\mu}, \hat{\theta} \rangle - \Psi(\hat{\theta})$ , we have

$$\begin{aligned}
\phi(\mu) &= \sup_{\theta \in \Theta} (\langle \mu, \theta \rangle - \Psi(\theta)) \\
&\geq \sup_{\theta \in \Theta'} \left( \langle \mu, \theta \rangle - \Psi(\hat{\theta}) - \langle \hat{\mu}, \theta - \hat{\theta} \rangle - \frac{\sigma}{2} \|\theta - \hat{\theta}\|_2^2 \right) \\
&= \langle \hat{\mu}, \hat{\theta} \rangle - \Psi(\hat{\theta}) + \sup_{\theta \in \Theta'} \left( \langle \mu, \theta \rangle - \langle \hat{\mu}, \theta \rangle - \frac{\sigma}{2} \|\theta - \hat{\theta}\|_2^2 \right) \\
&= \phi(\hat{\mu}) + \langle \hat{\theta}, \mu - \hat{\mu} \rangle + \sup_{\theta \in \Theta'} \left( \langle \mu - \hat{\mu}, \theta - \hat{\theta} \rangle - \frac{\sigma}{2} \|\theta - \hat{\theta}\|_2^2 \right).
\end{aligned}$$

In the last step, note that  $\hat{\theta} = \nabla \phi(\hat{\mu})$ . Taking  $\theta - \hat{\theta} = \alpha(\mu - \hat{\mu})$  where  $\alpha = 1/\sigma$ .  $\theta \in \Theta'$  if  $\mu - \hat{\mu}$  is sufficiently small. We have

$$\sup_{\theta \in \Theta'} \left( \langle \mu - \hat{\mu}, \theta - \hat{\theta} \rangle - \frac{\sigma}{2} \|\theta - \hat{\theta}\|_2^2 \right) \geq (\alpha - \frac{\sigma}{2} \alpha^2) \|\mu - \hat{\mu}\|_2^2 = \frac{1}{2\sigma} \|\mu - \hat{\mu}\|_2^2.$$

Therefore  $\phi$  is locally strongly convex at  $\hat{\mu}$  with strongly convex parameter  $1/\sigma$ .  $\square$

In Proposition 4.2, since  $\Psi$  is locally Lipschitz continuous, we have that  $\Psi$  is locally strongly smooth with smoothness parameter  $\sigma_c$  at  $\hat{\theta}_c$ , where  $\sigma_c$  can be chosen as the local Lipschitz constant for a neighborhood around  $\hat{\theta}_c$ . By Lemma D.1 and the proof of Proposition 4.2, for sufficiently small  $\rho_c$ ,  $c = 1, \dots, C$ , we can choose  $m$  explicitly as  $m = \min_c 1/\sigma_c$ , thus  $\kappa_2 = \sqrt{2 \max_c \rho_c \cdot \max_c \sigma_c}$ .



## References

- [1] C. D. ALIPRANTIS AND K. C. BORDER, *Infinite Dimensional Analysis: A Hitchhiker's Guide*, Springer, 2006.
- [2] P. K. ANDERSEN AND R. D. GILL, *Cox's regression model for counting processes: A large sample study*, Annals of Statistics, 10 (1982), pp. 1100–1120.
- [3] A. BANERJEE, S. MERUGU, I. DHILLON, AND J. GHOSH, *Clustering with Bregman divergences*, Journal of Machine Learning Research, 6 (2005), pp. 1705–1749.
- [4] H. BAUSCHKE AND J. BORWEIN, *Legendre functions and the method of random Bregman projections*, Journal of Convex Analysis, 4 (1997), pp. 27–67.
- [5] C. BERGE, *Topological Spaces: Including a Treatment of Multi-Valued Functions, Vector Spaces, and Convexity*, Courier Corporation, 1963.
- [6] D. BERTSEKAS, *Convex Optimization Theory*, Athena Scientific, 2009.
- [7] J. M. BORWEIN AND A. S. LEWIS, *Convex Analysis and Nonlinear Optimization*, Springer, 2006.
- [8] S. BOUCHERON, G. LUGOSI, AND P. MASSART, *Concentration Inequalities: A Nonasymptotic Theory of Independence*, OUP Oxford, 2013.
- [9] R. GOEBEL AND R. T. ROCKAFELLAR, *Local strong convexity and local Lipschitz continuity of the gradient of convex functions*, Journal of Convex Analysis, 15 (2008), p. 263–270.
- [10] R. GRAY, *Entropy and Information Theory*, Springer, 2011.
- [11] V. NGUYEN, D. KUHN, AND P. MOHAJERIN ESFAHANI, *Distributionally robust inverse covariance estimation: The Wasserstein shrinkage estimator*, arXiv preprint arXiv:1805.07194, (2018).
- [12] R. T. ROCKAFELLAR, *Convex Analysis*, Princeton University Press, 1970.
- [13] M. SION, *On general minimax theorems*, Pacific Journal of Mathematics, 8 (1958), pp. 171–176.
